# Supplementary material
Source: PubMed Central journal article supplement (PMC2593676)
Supplement: pp.108.124784_3.pdf [file pp.108.124784_3.pdf]

**Table S5.** Oligonucleotides used in this study for cloning full-length cDNAs and promoter regions of genes belonging to either one of the *ATRI*-like and *MYB28*-like clades.

| Gene   | Promoter | ATG no.   | 5' oligonucleotide                      | 3' oligonucleotide                        |
|--------|----------|-----------|-----------------------------------------|-------------------------------------------|
| MYB28  |          | AT5G61420 | ACTCGAGACAATGTCAAGAAAGCCATGTTGCGTC      | AAACTGTCAAGAAAGCCATGTTGCGTCGGAGGATCCT     |
| MYB29  |          | AT5G07690 | AAGTCGACCAAGATGTCAAGAAAGCCATGTTGTGTG    | TCATATGATCCGTTGATTGCTTACCGGGGATCCTT       |
| MYB76  |          | AT5G07700 | AAGTCGACAATGTCAAAGAGACCATATTGTATCGG     | CTTATGATCTGTCTATAGATGGCTTGGGATCCTT        |
| MYB34  |          | AT5G60890 | ACTCGAGAGAGCAGAGAGATGGTGAGGACACCA       | TTGGAGTCTTTGTCTGACGAGTCAGACTGGATCCT       |
| MYB51  |          | AT1G18570 | ACTCGAGTCAAGAATGGTGCGGACCCGTGTTGCA      | TGGATGAGTGAAACTCATAATCGATGAGGATCCT        |
| MYB122 |          | AT1G74080 | ACTCGAGTCAAGAATGGTACGGACGCCGTGTTGT      | TGGATGAGTTATATTGATGATGATGAGGATCCT         |
|        | pMYB28   |           | ACTGCAGAGGAGCTCTTGATGGTGTGGTCTTTAGCCT   | TCGAAAAACTGTCAAGAAAGCCATGTTGCGTGGATCCT    |
|        | pMYB29   |           | TCTGCAGGTGTATTAAGCCTATATGAGAGTTAGTTATAG | AAGATCTCAAGAAAGCCATGTTGTGTGGGAGGATCCA     |
|        | pMYB76   |           | ACTGCAGTCCCTACTGACTACTGAGAAAGTCGATAAGCT | CTAAGAAACTGTCAAAGAGACCATATTGTATCGGGGATCCT |
|        | pMYB34   |           | AACTGCAGGTGATTGTGAAGATCATGGCCGGTGGGCAT  | AGAGCAGAGAGCTGGTGAGGACACCATGTGGTACCTT     |
|        | pMYB51   |           | AACTGCAGGTTGATGTAAACCAAGCTGGTTAGCTTTCT  | GAATCAAGACTGGTGCGGACCCGTGTTGCAGGATCCTT    |
|        | pMYB122  |           | AACTGCAGAGGTCCAGTGTGTTGAGCGACCAAGTTGTAG | AGAATCAAGACTGGTACGGACGCCGTGTTGTGGATCCTT   |
